# Supplementary material for: Synthesis of cRGD peptide cluster-decorated NIR-fluorescent PISA-RAFT nanoparticles targeting integrin expressing cells
Source: Royal Society of Chemistry journal article supplement (doi:10.1039/d3py01176c), 2023-12-19
Supplement: d3py01176c1.pdf [file d3py01176c1.pdf]

## Electronic Supporting information

### Synthesis of cRGD peptide cluster-decorated NIR-fluorescent PISA-RAFT nanoparticles targeting integrin expressing cells

Damien Duret,<sup>a</sup> Adrien Grassin,<sup>b</sup> Maxime Henry,<sup>c</sup> Pierre Alcouffe,<sup>a</sup> Sebastian Raja,<sup>d</sup> Carlos Baleizao,<sup>d</sup> José Paulo Farinha,<sup>d</sup> Marie-Thérèse Charreyre,<sup>a</sup> Didier Boturyn,<sup>b</sup> Jean-Luc Coll,<sup>c</sup> Arnaud Favier<sup>a</sup>

<sup>a</sup> Université de Lyon, CNRS, Université Lyon 1, INSA Lyon, Université Jean Monnet, UMR 5223, Ingénierie des Matériaux Polymères, F-69621 Villeurbanne, France.

<sup>b</sup> University Grenoble Alpes, CNRS, UMR 5250, Department of Molecular Chemistry, 38000 Grenoble, France.

<sup>c</sup> University Grenoble Alpes, Institute for Advanced Biosciences, Team Cancer Targets and Experimental Therapeutics, INSERM U1209, CNRS UMR5309, Grenoble 38100, France.

<sup>d</sup> Centro de Química Estrutural, Institute of Molecular Sciences and Department of Chemical Engineering, Instituto Superior Técnico, University of Lisbon, P-1049-001 Lisbon, Portugal.

## PISA-RAFT experiments.

**Table S1.** Details PISA-RAFT experiments

| Exp.       | Solvent                                        | MacroCTA                           | CTA/<br>ACPA | BDA<br>(mol%<br>vs. nBA) | Fluorescent<br>monomer<br>(mol% vs.<br>nBA) | Time<br>(h) | Conv.<br>(%) | QELS<br>$D_h$ (sd) | PDI  |
|------------|------------------------------------------------|------------------------------------|--------------|--------------------------|---------------------------------------------|-------------|--------------|--------------------|------|
| <b>1</b>   | H <sub>2</sub> O                               | PNAM                               | 5            | 0                        | 0                                           | 27          | 89           | 42 (17)            | 0.20 |
| <b>2</b>   |                                                |                                    | 3            |                          |                                             | 21          | 80           | 48 (18)            | 0.17 |
| <b>3</b>   |                                                |                                    | 2.5          |                          |                                             | 5           | 93           | 62 (25)            | 0.19 |
| <b>4</b>   |                                                |                                    | 2            |                          |                                             | 2           | 97           | 68 (23)            | 0.15 |
| <b>5</b>   | H <sub>2</sub> O/CH <sub>3</sub> CN<br>50 vol% | PNAM                               | 2.5          | 0                        | 0                                           | 1.5         | 40           | 34 (9)             | 0.15 |
|            |                                                |                                    |              |                          |                                             | 2.5         | 58           | 45 (13)            | 0.18 |
|            |                                                |                                    |              |                          |                                             | 3.5         | 71           | 50 (14)            | 0.15 |
|            |                                                |                                    |              |                          |                                             | 4.5         | 78           | 51 (17)            | 0.12 |
|            |                                                |                                    |              |                          |                                             | 20          | 83           | 59 (19)            | 0.18 |
| <b>6</b>   | H <sub>2</sub> O/CH <sub>3</sub> CN<br>50 vol% | PNAM                               | 2.5          | 1.5                      | 0                                           | 6           | 86           | 59 (19)            | 0.21 |
| <b>7</b>   |                                                |                                    |              | 3                        |                                             | 6           | 81           | 42 (11)            | 0.10 |
| <b>8</b>   |                                                |                                    |              | 6                        |                                             | 6           | 86           | 38 (10)            | 0.11 |
| <b>9</b>   |                                                |                                    |              | 9                        |                                             | 6           | 92           | 58 (18)            | 0.16 |
| <b>10</b>  |                                                |                                    |              | 12                       |                                             | 6           | 91           | gel                | n/a  |
| <b>11</b>  | H <sub>2</sub> O/CH <sub>3</sub> CN<br>50 vol% | PNAM                               | 2.5          | 3                        | PDI-BisMAm<br>0.15                          | 6           | 67           | 36 (11)            | 0.19 |
| <b>NP1</b> | H <sub>2</sub> O/CH <sub>3</sub> CN<br>50 vol% | PNAM                               | 2.5          | 3                        | Cy5.5-Am<br>0.15                            | 6           | 85           | 47 (10)            | 0.15 |
| <b>NP2</b> | H <sub>2</sub> O/CH <sub>3</sub> CN<br>50 vol% | PNAM +<br>Peptide-PNAM<br>2.5 mol% | 2.5          | 3                        | 0                                           | 6           | 83           | 52                 | 0.12 |
| <b>NP3</b> | H <sub>2</sub> O/CH <sub>3</sub> CN<br>50 vol% | PNAM +<br>Peptide-PNAM<br>2.5 mol% | 2.5          | 3                        | Cy5.5-Am<br>0.15                            | 6           | 58           | 63 (27)            | 0.18 |

## Synthesis of PDI-BisMAM NIR-fluorescent crosslinker.

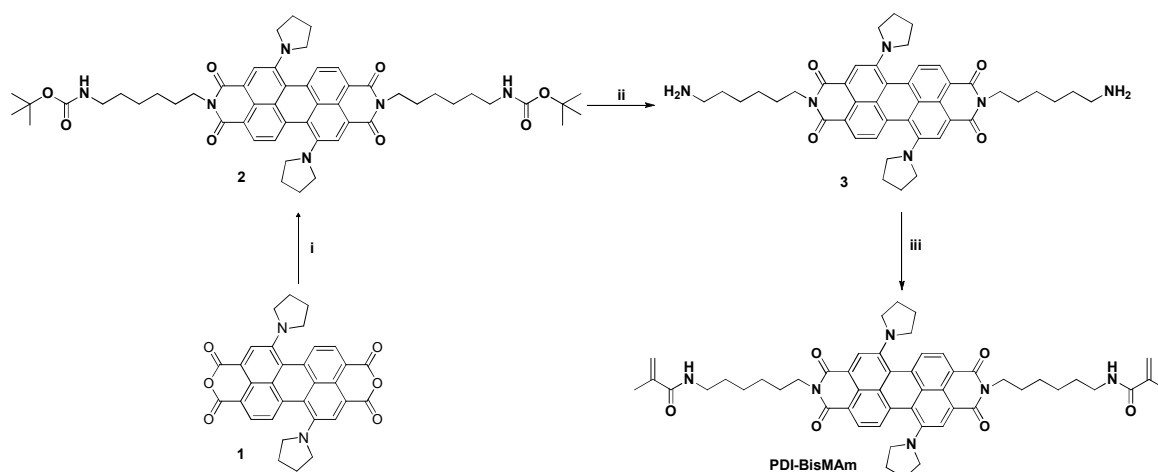

**Scheme S1.** Synthesis of PDI PDI-BisMAM NIR-fluorescent crosslinker. Reagents and conditions: i) *N*-Boc-1,6-hexanediamine,  $\text{NEt}_3$ , DMF,  $100^\circ\text{C}$ , 48 h; ii)  $\text{CF}_3\text{COOH}$ , DCM,  $0^\circ\text{C}$ , 12 h; iii) methacryloyl chloride, TEA, toluene, 12 h.

***N,N'*-Bis[(amino-hexyl)-6-carbamic acid tert-butyl ester]-1,7-bis(pyrrolidin-1-yl)perylene-3,4:9,10-tetracarboxylic acid bisimide (2).** A mixture of 1,7-dipyrrolidinylperylene-3,4:9,10-tetracarboxylic acid bisanhydride (1) (0.04 g, 0.07 mmol), *N*-Boc-1,6-hexanediamine (0.08g, 0.36 mmol), synthesized as described in the literature,<sup>1</sup> and  $\text{NEt}_3$  (0.04g, 0.43 mmol) in DMF (15 mL) were added into a round-bottom flask. The reaction mixture was stirred in an argon atmosphere at  $100^\circ\text{C}$  for 48 h. After completion of the reaction, the mixture was washed with dichloromethane ( $3 \times 100$  mL) and water ( $1 \times 50$ ) mL. The organic phase was evaporated and a flash column chromatography was used with a 10:9:1 ratio of dichloromethane / ethylacetate / methanol to afford the final compound (2) as a greenish solid in 79% yield.

$^1\text{H}$  NMR (300 MHz,  $\text{CDCl}_3$ ):  $\delta$  1.42 (s, 28H); 1.74 (s, 4H); 1.95-2.02 (m, 8H); 2.75 (s, 4H); 3.09-3.11 (m, 4H); 3.68 (s, 4H); 4.21 (t,  $J = 7.2$  Hz, 4H); 4.59 (s, 2H); 7.54 (d,  $J = 8.1$  Hz, 2H); 8.32 (d,  $J = 8.1$  Hz, 2H); 8.36 (s, 2H);  $^{13}\text{C}$  NMR (75 MHz,  $\text{CDCl}_3$ ):  $\delta$  25.9, 26.6, 26.7, 28.2, 28.6, 30.1, 31.1, 40.4, 40.6, 52.3, 79.1, 118.1, 119.1, 120.8, 121.7, 122.2, 123.9, 126.7, 129.9, 134.3, 146.6, 156.1, 164.2. HRMS (ESI):  $m/z$  for  $\text{C}_{54}\text{H}_{66}\text{N}_6\text{O}_8$  calcd. 926.4942; found 927.4987 ( $\text{M}^+\text{+H}$ ).

***N,N'*-Bis(6-aminohexane)1,7-dipyrrolidinylperylene-3,4:9,10-tetracarboxylic acid bisimide (3).** Compound (2) (0.04g, 0.04 mmol) was dissolved in dichloromethane (6 ml) and TFA (0.25 ml) was added drop-wise. The reaction mixture was stirred for 12 hours, at  $0^\circ\text{C}$ . Then, the reaction mixture was poured into ice and neutralized carefully with  $\text{NH}_3$  (solution at 10%) until pH 8. The residue was extracted with dichloromethane, washed with brine, dried over  $\text{Na}_2\text{SO}_4$  and evaporated to obtain the desired product (3) as a greenish solid in 57% yield.  $^1\text{H}$  NMR (300 MHz,  $\text{CDCl}_3$ ):  $\delta$  1.43 (s, 8H); 1.76-1.80 (m, 8H); 1.93-1.98 (m, 8H); 2.66-2.70 (m, 8H); 3.64 (s, 4H); 4.20 (t,  $J = 7.5$  Hz, 4H); 7.47 (d,  $J = 7.8$  Hz, 2H); 8.28 (d,  $J = 8.1$  Hz, 2H); 8.33 (s, 2H).  $^{13}\text{C}$  NMR (75 MHz,  $\text{CDCl}_3$ ):  $\delta$  25.7, 26.5, 26.9, 28.0, 33.5, 40.3, 42.0, 52.1, 117.8, 118.8, 120.6, 121.5, 121.9, 123.6, 126.5, 129.7, 134.0, 146.3, 164.0.

***N,N'*-Bis[(amino-hexyl)-6-methacrylamide]-1,7-bis(pyrrolidin-1-yl)perylene-3,4:9,10-tetracarboxylic acid bisimide (4)**. Compound (3) (0.04, mmol) and methacryloyl chloride (0.04, mmol) were dissolved in toluene (10 ml). The reaction mixture was stirred for 12 hours, at room temperature. Then, the residue was extracted with dichloromethane, washed with brine, dried over Na<sub>2</sub>SO<sub>4</sub> and evaporated to obtain the desired product (4) as a greenish solid in 73% yield.

<sup>1</sup>H NMR (300 MHz, CDCl<sub>3</sub>): δ 1.37-1.76 (m, 20H); 1.96 (s, 6H); 2.68 (s, 4H); 3.09-3.10 (m, 4H); 3.27-3.31 (m, 4H); 3.61 (s, 4H); 4.20 (t, *J* = 6.6 Hz, 4H); 5.29 (s, 2H); 5.70 (s, 2H); 6.16 (s, 2H); 7.40 (d, *J* = 7.8 Hz, 2H); 8.21-8.24 (m, 4H); <sup>13</sup>C NMR (75 MHz, CDCl<sub>3</sub>): δ 8.6, 18.7, 25.7, 26.4, 26.5, 27.9, 29.3, 29.6, 39.4, 40.0, 45.8, 52.0, 117.7, 118.7, 119.1, 120.5, 121.3, 121.8, 123.5, 126.4, 129.5, 133.8, 140.2, 146.2, 163.9, 168.4. HRMS (ESI): *m/z* for C<sub>52</sub>H<sub>58</sub>N<sub>6</sub>O<sub>6</sub> calcd. 862.4418; found 863.4472 (M<sup>+</sup>).

## Purification of the cRGDcluster-CTA.

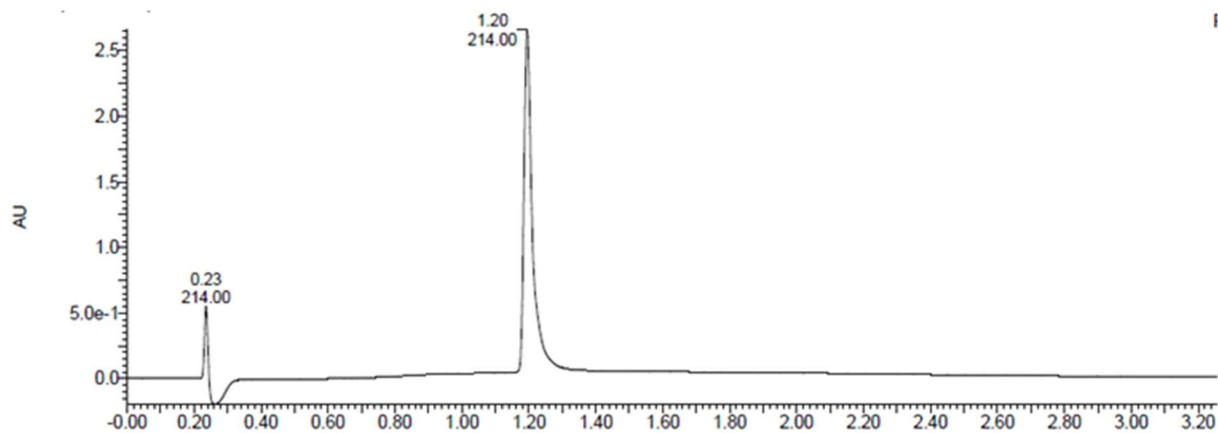

Figure S1. RP-UHPLC chromatogram of the purified cRGDcluster-CTA ( $\lambda = 214$  nm)

## NMR spectra.

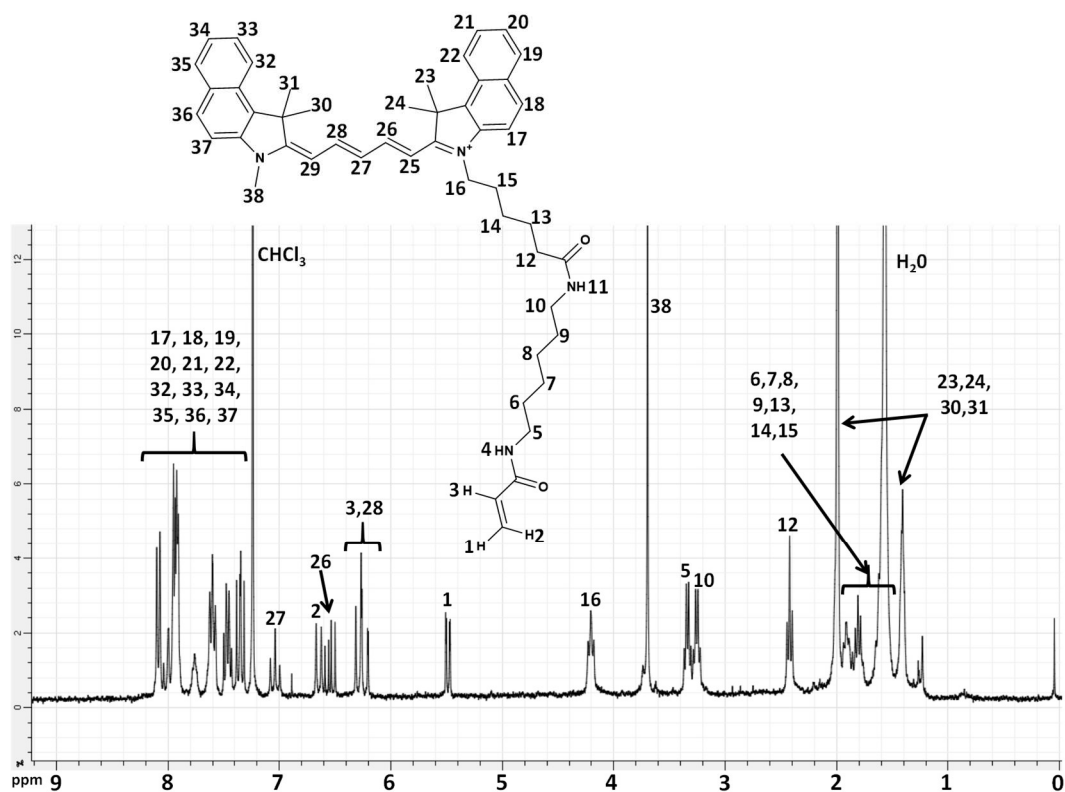

Figure S2.  $^1\text{H}$  NMR spectrum of the purified Cy5.5-Am monomer in  $\text{CDCl}_3$

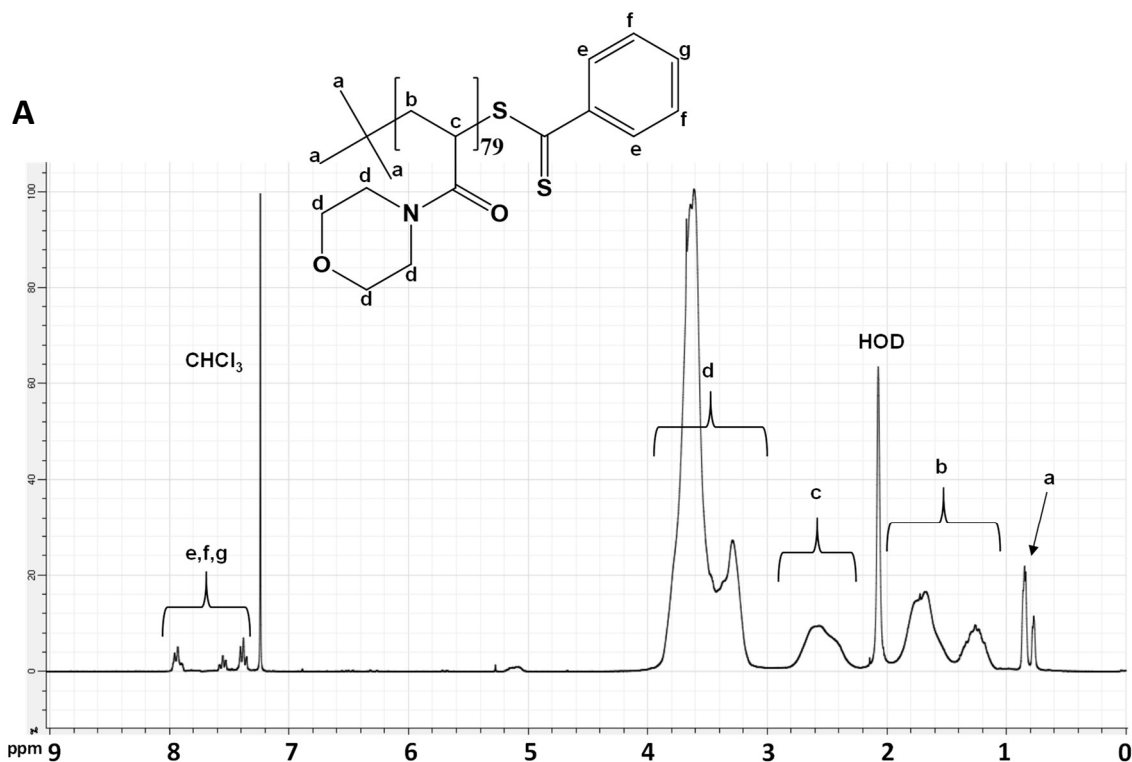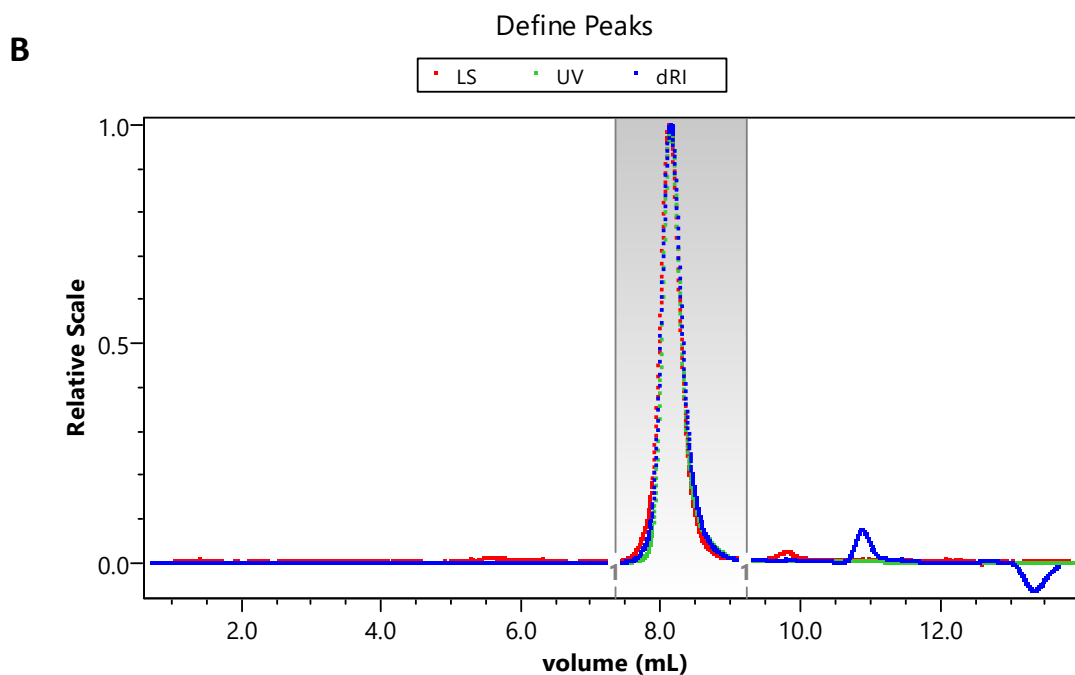

**Figure S3.** <sup>1</sup>H NMR spectrum in CDCl<sub>3</sub> (A) and SEC-MALLS analysis (B) of PNAM-CTA prepared by RAFT polymerization in the presence of tert-butyl dithiobenzoate CTA. Protons corresponding to the polymer chain-ends were clearly observed on the NMR spectrum and SEC-MALLS chromatograms showed a very narrow distribution ( $M_n = 11\,300\text{ g}\cdot\text{mol}^{-1}$ ,  $\mathcal{D} = 1.03$ ), as demonstrated by the overlapping of the peaks detected by a multi-angle light scattering detector (red), a UV detector set at 302 nm (absorption band of the dithiobenzoate end-group of the polymer chain) (green) and a refractive index detector (blue).  $M_n$  values obtained by both techniques were in very close agreement.<sup>2</sup>

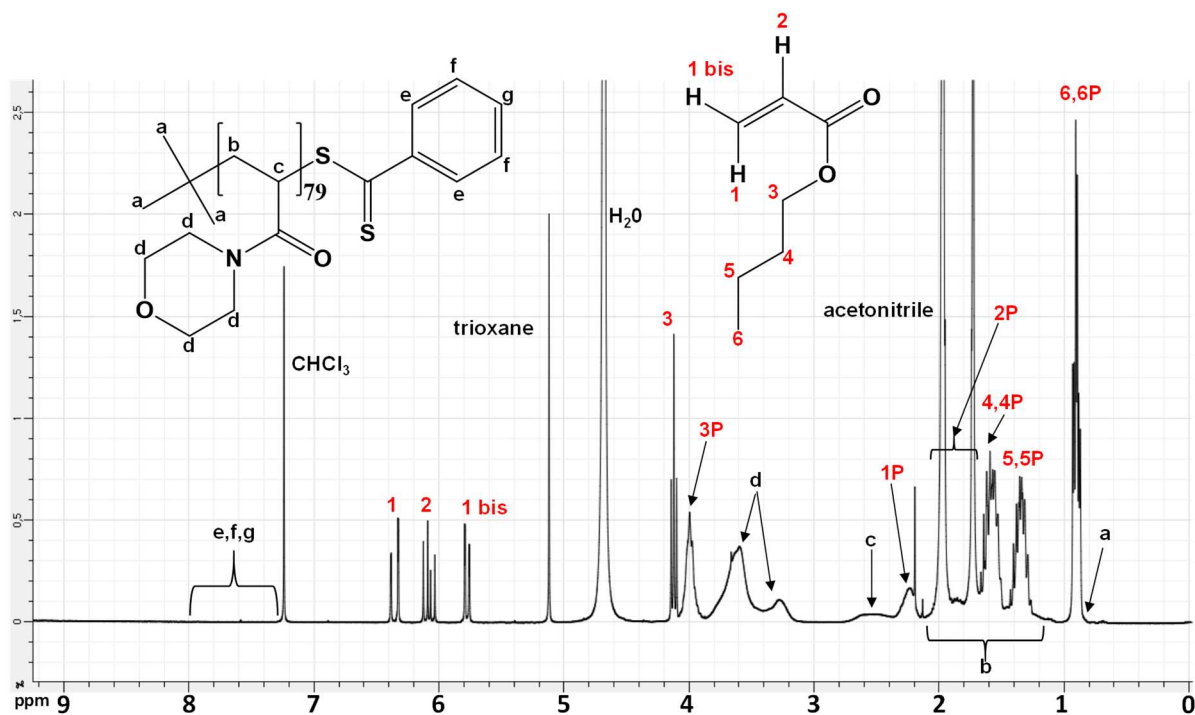

**Figure S4.**  $^1\text{H}$  NMR spectrum in  $\text{CDCl}_3$  of a raw PISA-RAFT sample withdrawn during polymerization of nBA in the presence of the PNAM macroCTA in water/acetonitrile 50vol%.

**Table S2.**  $^1\text{H}$  NMR attribution for the cRGDcluster-PNAM macroCTA

| Area                    |                           | cRGDcluster-PNAM macroCTA |                                                     |                           |                                                  |
|-------------------------|---------------------------|---------------------------|-----------------------------------------------------|---------------------------|--------------------------------------------------|
|                         |                           | ppm                       | Attribution                                         | Number of protons         | Observed in $\text{D}_2\text{O}$ /acetonitrile-d |
| <b>A</b><br>(6-9 ppm)   |                           | >8                        | COOH (Asp)                                          | $4 \times n_p$            | No                                               |
|                         |                           | >8                        | CO-NH (peptide amides)                              | $36 \times n_p$           | No                                               |
|                         |                           | >8                        | NH-C(=O) (Lys)                                      | $1 \times n_p$            | No                                               |
|                         |                           | 7.5                       | NH (Arg)                                            | $16 \times n_p$           | No                                               |
|                         |                           | 7.5                       | CH (oxime linker)                                   | $4 \times n_p$            | Yes                                              |
|                         |                           | 7.2-7.3                   | H-aromatic (Phe)                                    | $20 \times n_p$           | Yes                                              |
|                         |                           | 7.2-8                     | H-aromatic<br>( $\omega$ -dithiobenzoate chain-end) | $5 \times n_p$            | Yes                                              |
|                         |                           | <b>total</b>              |                                                     | $86 \times n_p$           | <b><math>29 \times n_p</math></b>                |
| <b>B</b><br>(3-5.5 ppm) | <b>D</b><br>(2.3-5.5 ppm) | 5.2                       | CH-S-C(=S)-Ph                                       | $1 \times n_p$            | Yes                                              |
|                         |                           | 4-5                       | CO-CH-N (peptide)                                   | $24 \times n_p$           | Yes                                              |
|                         |                           | 4.9                       | CO-CH <sub>2</sub> -O (oxime linker)                | $8 \times n_p$            | Yes                                              |
|                         |                           | 4.6                       | CH (squelette ATC)                                  | $1 \times n_p$            | Yes                                              |
|                         |                           | 4.1                       | CO-CH <sub>2</sub> -N (Gly)                         | $12 \times n_p$           | Yes                                              |
|                         |                           | 3.76                      | CH <sub>2</sub> (morpholine NAM)                    | $8 \times n_{\text{NAM}}$ | Yes                                              |
|                         |                           | 3.4                       | CH <sub>2</sub> -Phenyl (Phe)                       | $8 \times n_p$            | Yes                                              |
|                         |                           | 2.6-3.5                   | CH <sub>2</sub> -N (Arg, Lys, Pro)                  | $28 \times n_p$           | Yes                                              |
|                         |                           | 2.7-2.9                   | CH <sub>2</sub> -COOH (Asp)                         | $8 \times n_p$            | Yes                                              |
|                         |                           | 2.7                       | CH (PNAM backbone)                                  | $1 \times n_{\text{NAM}}$ | Yes                                              |
|                         |                           | 2.7                       | CH <sub>2</sub> -NH-C(=O) (Lys)                     | $2 \times n_p$            | Yes                                              |
|                         |                           |                           | <b>total</b>                                        |                           | $9 \times n_{\text{NAM}} + 92 \times n_p$        |
| <b>C</b><br>(0-3 ppm)   | <b>E</b><br>(0-2.3 ppm)   | 1.9-2.3                   | CH <sub>2</sub> (Pro)                               | $8 \times n_p$            | Yes                                              |
|                         |                           | 1.9                       | CH <sub>2</sub> (squelette polymère)                | 2x                        | Yes                                              |
|                         |                           | 1.6-1.8                   | CH <sub>2</sub> (Arg)                               | $16 \times n_p$           | Yes                                              |
|                         |                           | 1.2-1.8                   | CH <sub>2</sub> (Lys)                               | $54 \times n_p$           | Yes                                              |
|                         |                           | 1.6                       | CH <sub>3</sub> (squelette ATC)                     | $3 \times n_p$            | Yes                                              |
|                         |                           | 1.5                       | CH <sub>3</sub> (Ala)                               | $3 \times n_p$            | Yes                                              |
|                         |                           |                           | <b>total</b>                                        |                           | $2 \times n_{\text{NAM}} + 84 \times n_p$        |

$n_p$  = Number of cRGD-peptide-cluster,  $n_{\text{NAM}}$  = number of NAM units.



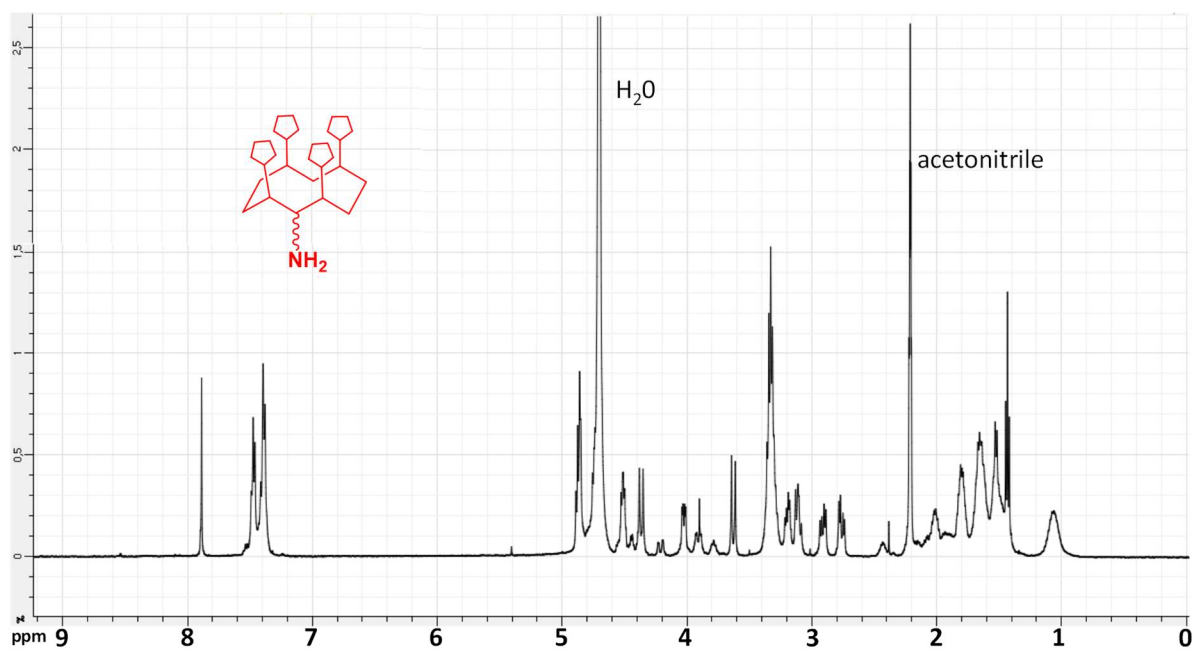

**Figure S5.**  $^1\text{H}$  NMR of the free cRGD-peptide-cluster in  $\text{D}_2\text{O}/\text{CD}_3\text{CN}$  70/30 vol%.

### Kinetics of PISA-RAFT experiments.

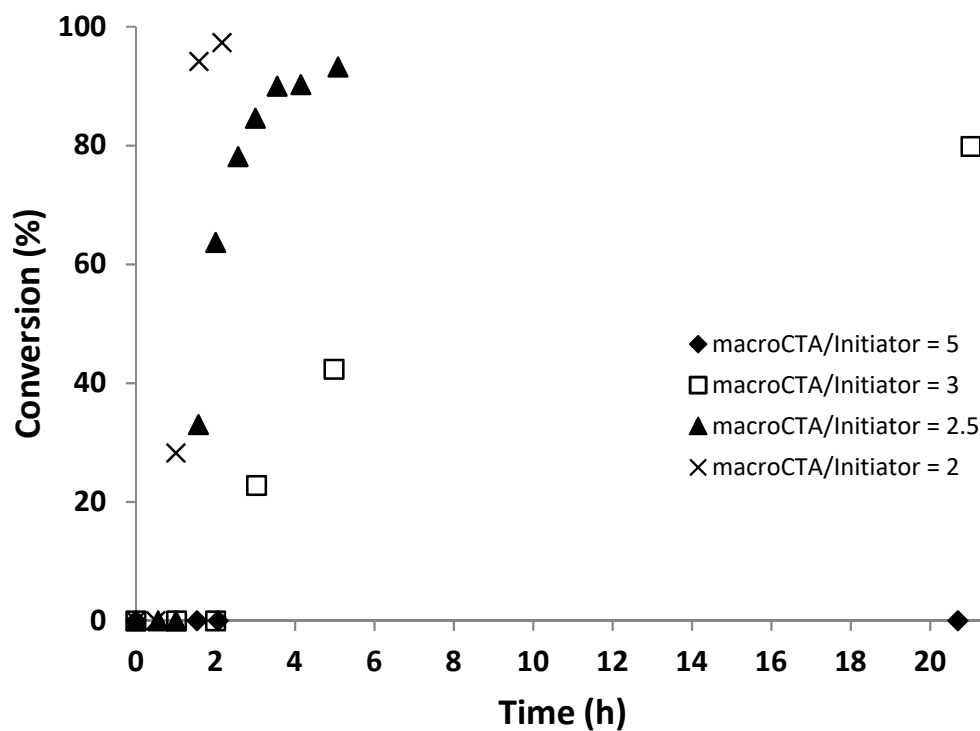

**Figure S6.** Kinetics of PISA-RAFT experiments at various macroCTA/Initiator ratio (Exp. 1-4 in Table S1). Solvent = Water, initial nBA concentration = 1M and initial molar ratio nBA/macroCTA = 156.3.

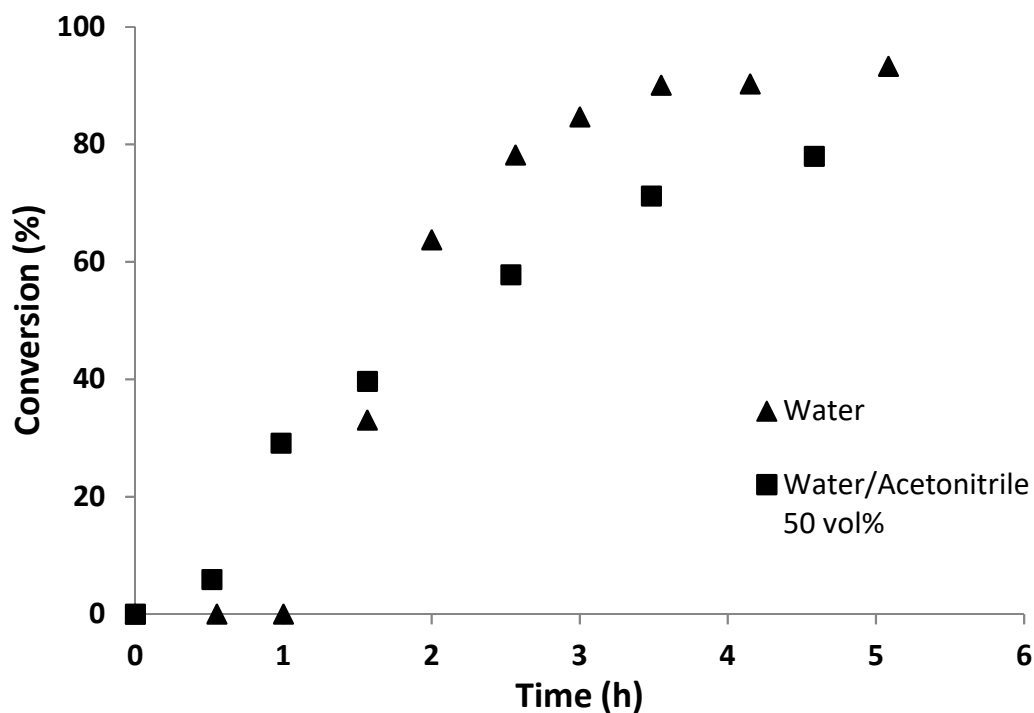

**Figure S7.** Comparison of PISA-RAFT experiments performed in water and in a mixture water/acetonitrile 50 vol% (Exp. 3 and 5 in Table S1, respectively).

Evolution of the hydrodynamic PISA-RAFT nanoparticle diameter with polymerization.

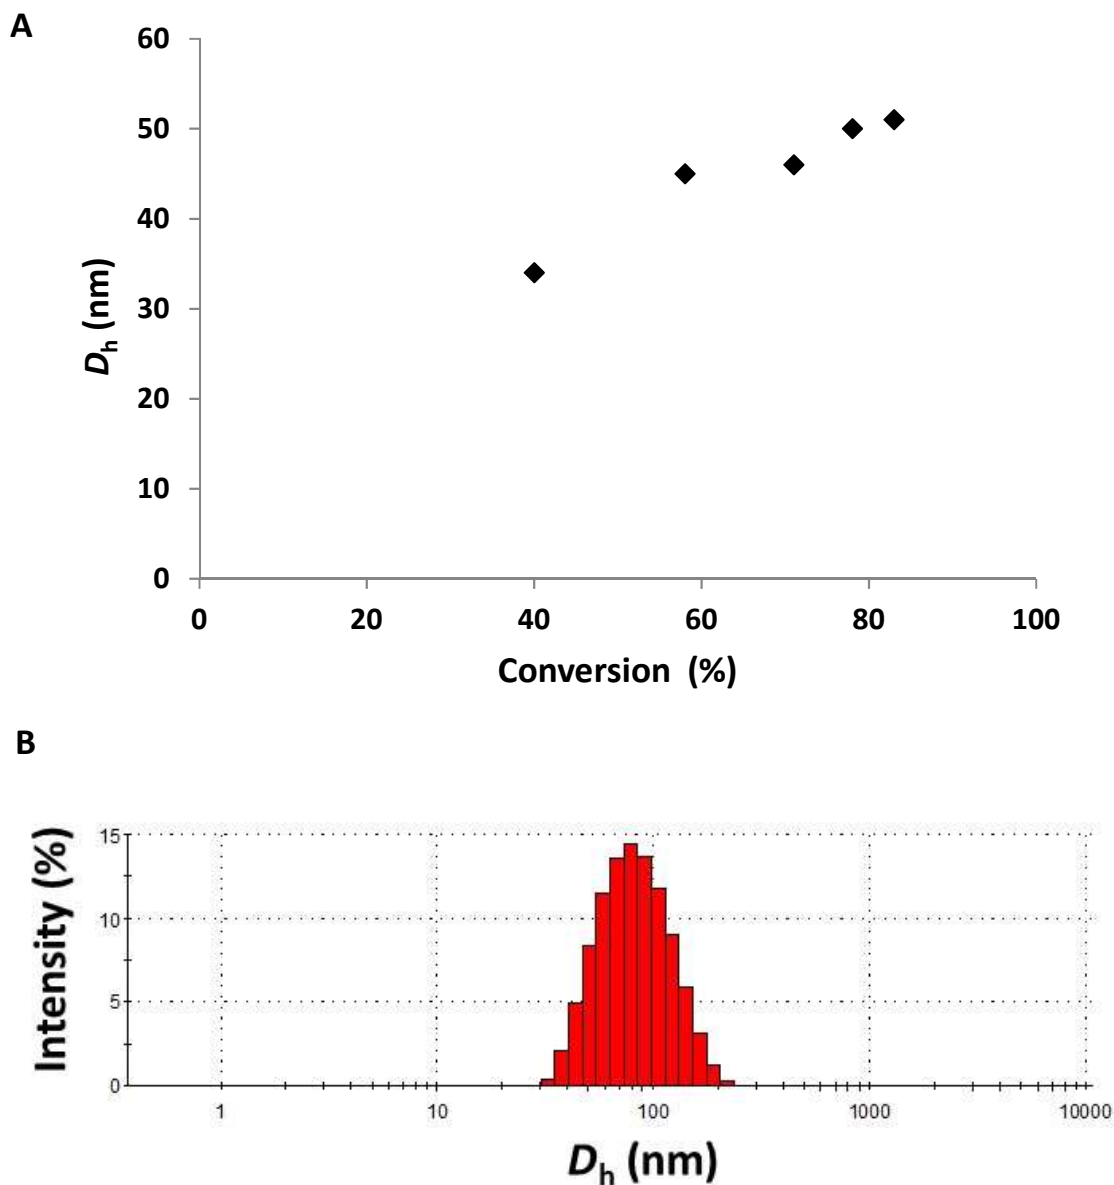

**Figure S8.** (A) Evolution of the nanoparticle hydrodynamic diameter  $D_h$  (determined by QELS) with nBA conversion during PISA-RAFT experiment in water/acetonitrile 50 vol% (Exp. 5 in Table S1). (B) Intensity distribution of the sample (monomer conversion = 83%). Corresponding number distribution is given in Fig. 4.

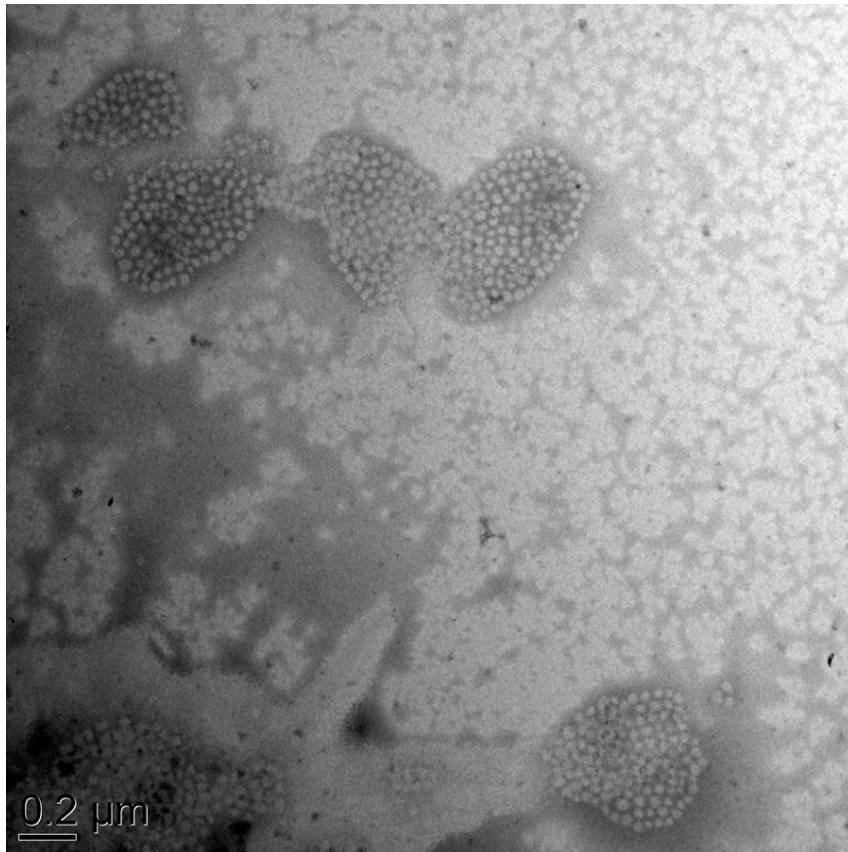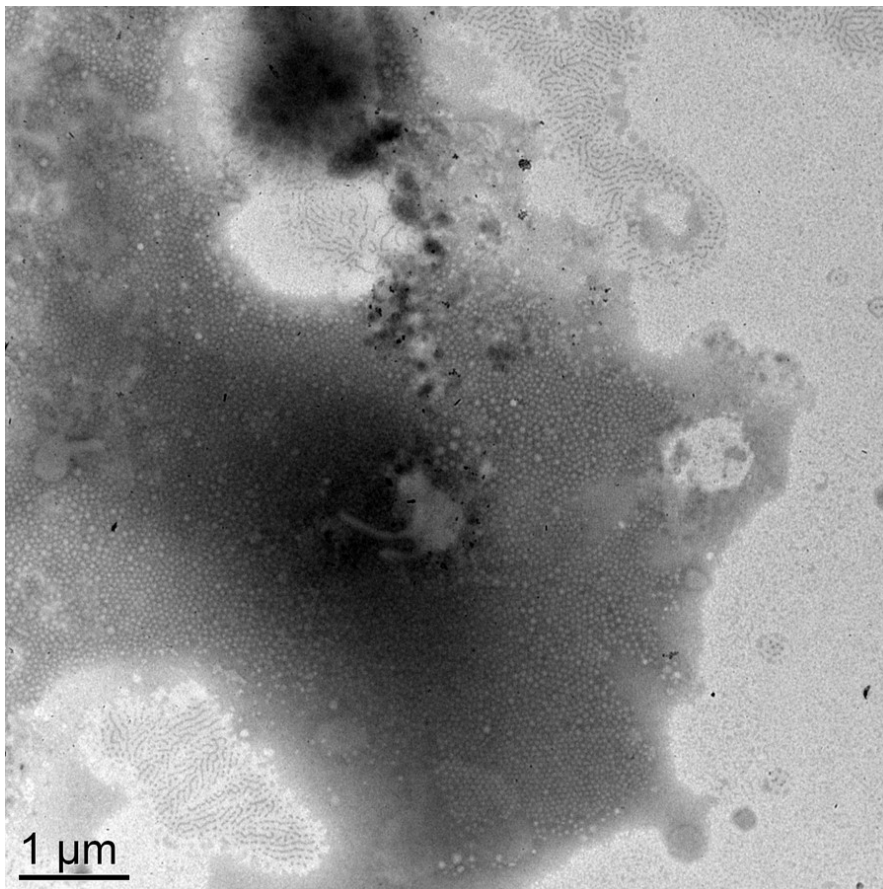

**Figure S9.** Complementary TEM images of the nanoparticles

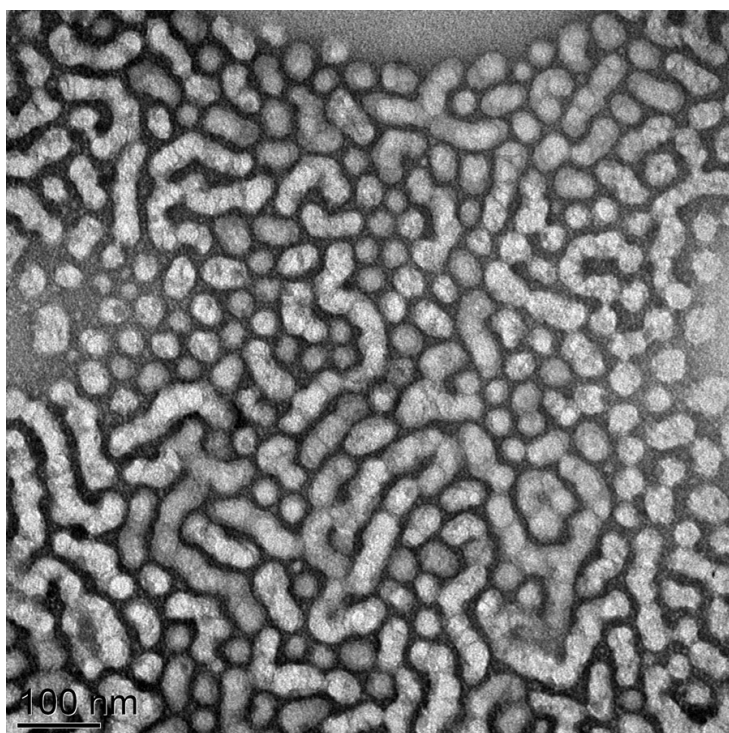

**Figure S10.** TEM image illustrating the nanoparticle fusion under the electron beam

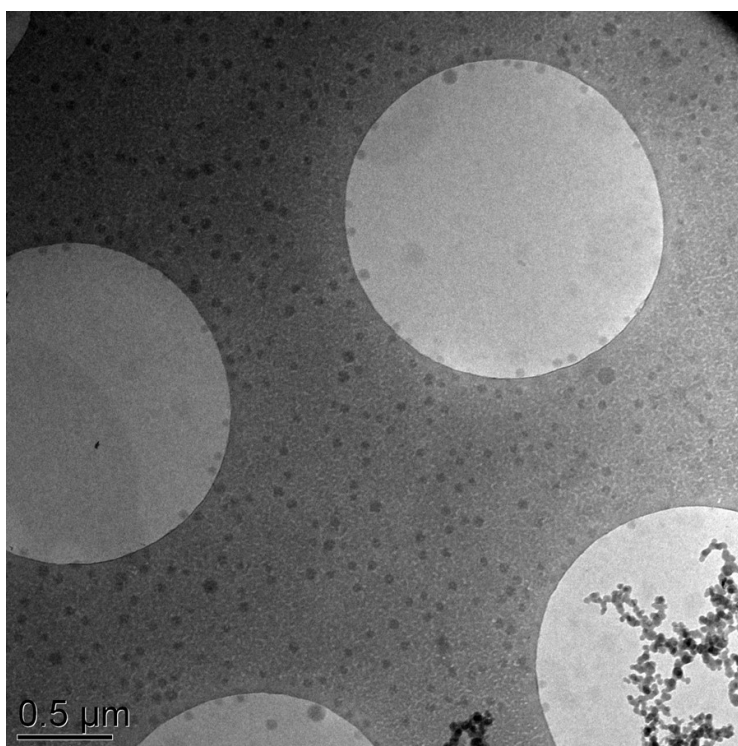

**Figure S11.** Complementary cryoTEM image showing that the nanoparticles were mainly located on top of the carbon support (dark grey area). Few of them were located on the edge of the holes (light grey areas). Dark crystals like in the bottom right hole corresponded to ice crystals formed during the cryo process.

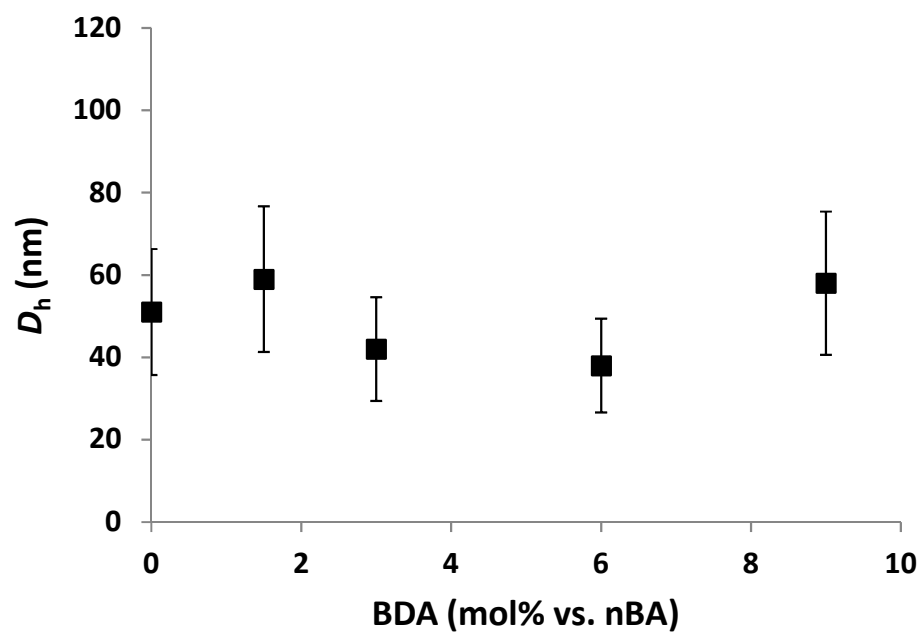

**Figure S12.** Hydrodynamic diameter ( $D_h$ , determined by QELS) of the PISA-RAFT nanoparticles obtained with an increasing molar ratio of BDA crosslinker (Exp. 5-9 in Table S1).

### UV-Vis absorption and fluorescence spectra of the fluorescent PISA-RAFT nanoparticles.

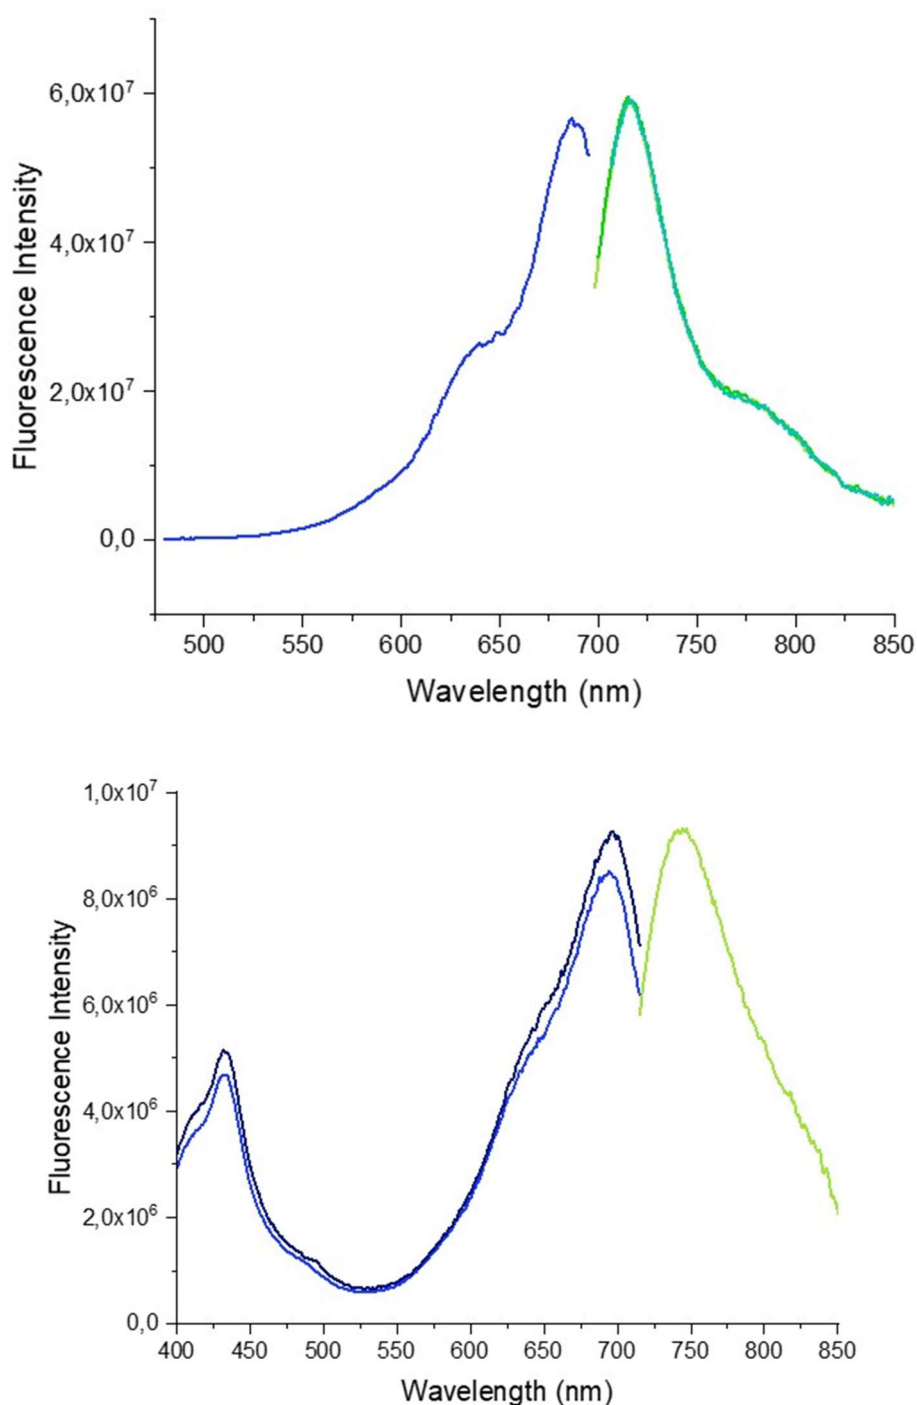

**Figure S13.** Excitation (blue curves) and emission (green curves) spectra of NIR-fluorescent PISA-RAFT nanoparticles samples. A) Cy5.5-fluorescent nanoparticles excitation spectrum for  $\lambda_{em} = 710$  nm (blue) and fluorescence emission spectra respectively for  $\lambda_{ex} = 683$  nm (green) and  $\lambda_{ex} = 685$  nm (dark green), slits = 1.75 nm in all cases. B) PDI-BisMAM-fluorescent nanoparticles excitation spectra respectively for  $\lambda_{em}=730$  nm (blue) and  $\lambda_{em}=745$  nm (dark blue) and fluorescence emission spectrum for  $\lambda_{ex}= 695$  nm (green), slits = 6 nm in all cases.

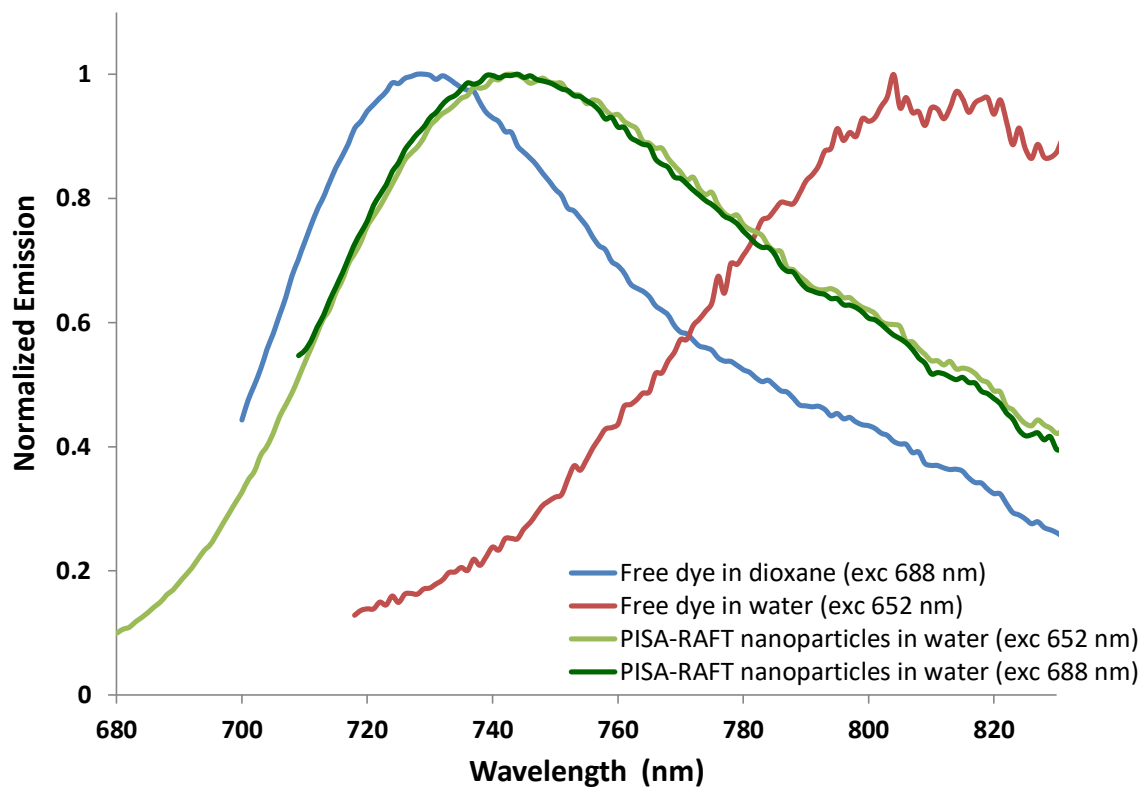

**Figure S14.** Comparison of the fluorescence emission spectra of the free PDI-BisMAM dye in dioxane (blue) and in water (red) with the fluorescence emission of the PDI-BisMAM fluorescent PISA-RAFT nanoparticles (green).



## Calculated nanoparticle characteristics for the reference experiment 5.

**Table S3.** Input and calculated parameters for the nanoparticles produced in the reference experiment 5 in Table S1.

| Input parameters                     | Abbreviation    | Value                                         |
|--------------------------------------|-----------------|-----------------------------------------------|
| C-C bond length                      | $L_{C-C}$       | 0.154 nm                                      |
| Avogadro number                      | $N_A$           | $6.02 \times 10^{23}$ molec.mol <sup>-1</sup> |
| PnBA density                         | $d_{PnBA}$      | 1.087 g.cm <sup>-3</sup>                      |
| Initial mass of nBA                  | $m_{nBA_0}$     | 0.36 g                                        |
| $DP_n$ PNAM macroCTA                 | $DP_{macroCTA}$ | 79                                            |
| Initial mole number of PNAM macroCTA | $n_{macroCTA}$  | $1.79 \cdot 10^{-5}$ mol                      |
| nBA final conversion                 | $Conv_{nBA}$    | 83 %                                          |
| $D_h$ (QELS)*                        | $D_h$           | 53 nm                                         |
| Hydrophobic core diameter (TEM)*     | $D_{core}$      | 38 nm                                         |

\* For those indicative estimations, we assumed that the hydrodynamic diameter determined by QELS and the core diameter determined from TEM images are reflective of respectively the overall diameter of the “hairy” nanoparticles and the PnBA core of the nanoparticles

| Calculated characteristics                                               | Abbreviation                       | Equation                                                                      | Values for Exp. 5                     |
|--------------------------------------------------------------------------|------------------------------------|-------------------------------------------------------------------------------|---------------------------------------|
| Volume of PnBA core                                                      | $V_{PnBA\ core}$                   | $\frac{4}{3} \times \pi \times \left(\frac{D_{core}}{2}\right)^3$             | $2.9 \times 10^{-17}$ cm <sup>3</sup> |
| Mass of PnBA core                                                        | $m_{PnBA\ core}$                   | $V_{PnBA\ core} \times d_{PnBA}$                                              | $3.1 \times 10^{-17}$ g               |
| Total number of nanoparticles (NP)                                       | $Nb_{NP}$                          | $\frac{m_{nBA_0} \times \frac{Conv_{nBA}}{100}}{m_{PnBA\ par\ NP}}$           | $9.6 \times 10^{15}$                  |
| Theoretical length of a fully extended PNAM macroCTA chain               | $L_{macroCTA}$                     | $2 \times L_{C-C} \times \sin\left(\frac{120}{2}\right) \times DP_{macroCTA}$ | 21 nm                                 |
| Theoretical maximum NP diameter                                          | $D_{max\ theo}$                    | $D_{core} + L_{macroCTA} \times 2$                                            | 80 nm                                 |
| Number of PNAM macroATC per NP                                           | $Nb_{hairs\ per\ NP}$              | $\frac{n_{macroCTA} \times N_A}{Nb_{NP}}$                                     | 1125                                  |
| Surface area of the NP core                                              | $S_{core}$                         | $4 \times \pi \times \left(\frac{D_{core}}{2}\right)^2$                       | 4536 nm <sup>2</sup>                  |
| Surface area of the NP outside corona (equivalent sphere)                | $S_{corona}$                       | $4 \times \pi \times \left(\frac{D_h}{2}\right)^2$                            | 8825 nm <sup>2</sup>                  |
| Number of polymer hairs per nm <sup>2</sup> of NP core surface           | $Nb_{hairs\ per\ core\ surface}$   | $\frac{Nb_{hairs\ per\ NP}}{S_{core}}$                                        | 0.25 hair.nm <sup>-2</sup>            |
| Number of polymer hairs per nm <sup>2</sup> of NP outside corona surface | $Nb_{hairs\ per\ corona\ surface}$ | $\frac{Nb_{hairs\ per\ NP}}{S_{corona}}$                                      | 0.13 hair.nm <sup>-2</sup>            |
| Core specific area per hair                                              | $SA_{core\ per\ hair}$             | $\frac{S_{core}}{Nb_{hairs\ per\ NP}}$                                        | 4 nm <sup>2</sup>                     |
| Outside corona specific area per hair                                    | $SA_{corona\ per\ hair}$           | $\frac{S_{corona}}{Nb_{hairs\ per\ NP}}$                                      | 7.9 nm <sup>2</sup>                   |
| Average distance between two hairs at the NP core surface                | $D_{hair-hair\ at\ core}$          | $\sqrt{SA_{core\ per\ hair}}$                                                 | 2 nm                                  |
| Average distance between two hairs at the NP outside corona surface      | $D_{hair-hair\ at\ corona}$        | $\sqrt{SA_{corona\ per\ hair}}$                                               | 2.8 nm                                |

## Calculated nanoparticle characteristics for experiment NP3.

**Table S4.** Calculated parameters for the nanoparticles produced in experiment NP3.

| Parameter                                                                            | Abreviation                          | Equation                                                                   | Values for NP3       |
|--------------------------------------------------------------------------------------|--------------------------------------|----------------------------------------------------------------------------|----------------------|
| cRGDcluster-PNAM macroCTA mol% (vs. Total macroCTA)                                  | $Mol\%_{cRGDcluster}$                | $mol\%_{cRGDcluster-PNAM\ macroCTA}$                                       | 2.5                  |
| Number of PNAM hairs per NP                                                          | $Nb_{PNAM\ hairs\ per\ NP}$          | $\frac{n_{macroATC} \times (1 - Mol\%_{cRGDcluster}) \times N_A}{Nb_{NP}}$ | 1097                 |
| Number of cRGDcluster-PNAM hairs per NP                                              | $Nb_{cRGDcluster\ per\ NP}$          | $\frac{n_{macroCTA} \times Mol\%_{cRGDcluster} \times N_A}{Nb_{NP}}$       | 28                   |
| NP core surface area                                                                 | $S_{core}$                           | $4 \times \pi \times \left(\frac{D_{core}}{2}\right)^2$                    | 4536 nm <sup>2</sup> |
| NP outside corona surface area                                                       | $S_{corona}$                         | $4 \times \pi \times \left(\frac{D_h}{2}\right)^2$                         | 8825 nm <sup>2</sup> |
| Core specific area per cRGDcluster                                                   | $S_{core\ per\ cRGDcluster}$         | $\frac{S_{core}}{Nb_{cRGDcluster\ per\ NP}}$                               | 161 nm <sup>2</sup>  |
| Outside corona specific area per cRGDcluster                                         | $S_{corona\ per\ cRGDcluster}$       | $\frac{S_{corona}}{Nb_{cRGDcluster\ per\ NP}}$                             | 314 nm <sup>2</sup>  |
| Average distance between two cRGDcluster-PNAM hairs at the NP core surface           | $D_{cRGDcluster\ hairs\ at\ core}$   | $\sqrt{S_{core\ per\ cRGDcluster}}$                                        | 12.7 nm              |
| Average distance between two cRGDcluster-PNAM hairs at the NP outside corona surface | $D_{cRGDcluster\ hairs\ at\ corona}$ | $\sqrt{S_{corona\ per\ cRGDcluster}}$                                      | 17.7 nm              |
| Average number of Cy5.5-Am fluorophores per NP                                       | $Nb_{Cy5.5\ per\ NP}$                | $\frac{n_{Cy5.5-Am} \times N_A}{Nb_{NP}}$                                  | 265                  |

## References.

1. T. Ribeiro, S. Raja, A. S. Rodrigues, F. Fernandes, J. P. S. Farinha and C. Baleizão, *RSC Advances*, 2013, **3**, 9171-9174.
2. A. Favier, C. Ladaviere, M. T. Charreyre and C. Pichot, *Macromolecules*, 2004, **37**, 2026-2034.
